# Supplementary material for: Single-atom nanozyme-based catalytic ROS clearance for efficiently alleviating eczema
Source: Royal Society of Chemistry journal article supplement (doi:10.1039/d4tb02316a), 2025-01-01
Supplement: d4tb02316a1.pdf [file d4tb02316a1.pdf]

# Single-atom nanozymes-based catalytic ROS clearance for efficient alleviating eczema

*Zhen Wan,<sup>‡a,b</sup> Yadong Zhe,<sup>‡a</sup> Jiarong Li,<sup>‡c</sup> Qingshan Liu,<sup>a</sup> Danqi Ding,<sup>c</sup> Shaofang Zhang,<sup>a</sup> Shuangjie Liu,<sup>a</sup> Hao Wang,<sup>a</sup> Jiang Yang,<sup>d</sup> Xin Sun,<sup>a</sup> Huanhuan Qiao<sup>\*a</sup> and Xiaoyu Mu<sup>\*a</sup>*

<sup>a</sup> Tianjin Key Laboratory of Brain Science and Neural Engineering, Academy of Medical Engineering and Translational Medicine, Tianjin University, Tianjin 300072, China

<sup>b</sup> Haihe Hospital, Tianjin University, Tianjin300350, China

<sup>c</sup> Department of Physics and Tianjin Key Laboratory of Low Dimensional Materials Physics and Preparing Technology, School of Sciences, Tianjin University, Tianjin 300350, China

<sup>d</sup> *State Key Laboratory of Oncology in South China, Collaborative Innovation Center for Cancer Medicine, Sun Yat-sen University Cancer Center, Guangzhou 510060, China.*

<sup>‡</sup> These authors contributed to this work equally.

## **1 Reagents and Characterization**

### **Reagents**

Pyrene (98%), urea (AR), ruthenium (III) chloride ( $\text{RuCl}_3$ , 99.95%), 3,3',5,5'-tetramethylbenzidine (TMB, 98%), 5, 5-dimethyl-1-pyrrolin-N-oxide (DMPO, 97%) were purchased from Tianjin Heowns Biochem Technologies Co., Ltd. (China). Iron chloride hexahydrate (AR,  $\text{FeCl}_3 \cdot 6\text{H}_2\text{O}$ , 99%) and HRP ( $>300$  U/mg) were purchased from Shanghai Macklin Biochemical Co., Ltd. (China). Nitric acid (AR, 65.0-68.0%) was purchased from Tianjin Damao Chemical Reagent Co., Ltd. (China). Deionized water ( $>99.5\%$ ) was purchased from Tianjin Jiangtian Chemical Technology Co., Ltd. (China). Ammonium hydroxide (28.0-30.0%) was purchased from Anhui Senrise Technology Co., Ltd. (China).  $\text{H}_2\text{O}_2$  solution (AR, 30 wt% in  $\text{H}_2\text{O}$ ) was purchased from Shanghai Aladdin Biochemical Technology Co., Ltd. (China). NADH- $\text{Na}_2$  ( $>98\%$ ). TMB substrate colorimetric reagent kit (ELISA, HRP colorimetry) was purchased from Anhui Leagene Biotechnology Co., Ltd. (China). Total SOD assay kit (NBT riboflavin colorimetric method) was purchased from Shanghai Yuanye Bio-Technology Co., Ltd. (China). Acetic acid buffer (pH 4.5) was purchased from Beijing biotopped Technology Co., Ltd. (China).

### **Materials characterization**

The morphology and size of  $\text{RuN}_4$ -SAzyme were observed by dark-field transmission electron microscopy (TEM, JEM-F200, JEOL, Japan). Analysis of metal element content was performed using inductively coupled plasma mass spectrometry (ICP-MS: Agilent 7800, Agilent Technologies Ltd, Singapore). Atomic information of SANs was observed using aberration-corrected scanning transmission electron microscopy (AC-STEM, ARM200F, JEOL, Japan). X-ray diffraction (XRD, Smartlab, Rigaku, Japan) was employed for crystallographic identification of  $\text{RuN}_4$ -SAzyme. The Raman spectra was measured by an ultra-fast Raman imaging spectrometer (XploRA PLUS, HoribaJY, France) with the scanning wavenumber range of 500 - 3500  $\text{cm}^{-1}$ . Elemental composition, chemical states were obtained using X-ray photoelectron spectrometer (XPS, Axis Supra, Kratos Analytical Ltd, UK). The  $\cdot\text{OH}$

scavenging measurements were conducted on an ESR spectrometer (JES-FA200, JEOL, Japan).

### **Cell Toxicity Assessment**

Rat Aortic Endothelial Cells (RAOECs) were seeded in a 96-well plate at a density of approximately 4000 cells per well using Dulbecco's Modified Eagle Medium (DMEM) and incubated at 37°C for 12 hours to allow attachment and initial growth. Subsequently, a range of RuN<sub>4</sub>-SAzyme concentrations, from 0 to 25 µg/mL, were introduced into each well. Following an additional 24-hour incubation period, cell viabilities were assessed using the CCK-8 assay to determine the potential toxicity of the RuN<sub>4</sub>-SAzyme solutions.

### **Anti-oxidative levels of RuN<sub>4</sub>-SAzyme in vitro.**

RAOECs were plated in 6-well plates at a density of 15,000 cells per well and allowed to grow until fully adherent. DMEM containing RuN<sub>4</sub>-SAzyme at a concentration of 12 µg/mL was added to each well, followed by the introduction of LPS at a concentration of 0.5 mg/mL. After a 6-hour incubation period, DCFH-DA and DHE reagents were incorporated into the culture medium to measure intracellular levels of total ROS, including O<sub>2</sub><sup>•-</sup>. Following incubation times of 20 and 30 minutes for DCFH-DA and DHE respectively, the plates were rinsed three times with PBS to terminate the reactions. The RuN<sub>4</sub>-SAzyme served as a control in these experiments. Cellular fluorescence was visualized using a fluorescence microscope (EVOS, AMG), and quantitative analysis was conducted using flow cytometry (BD Accuri™ C6). The differences in fluorescence intensity were compared to analyze the levels of free radicals within the cells.

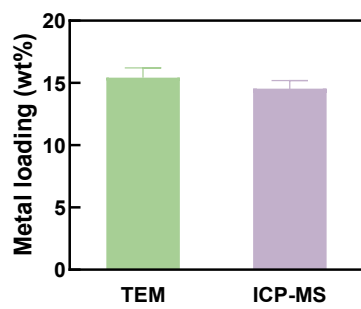

**Fig. S1** Ru atoms loading by EDS and ICP-MS.

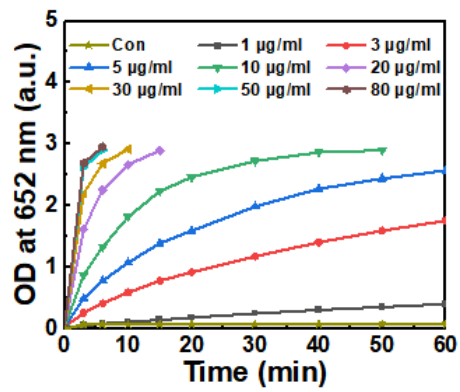

**Fig. S2** Time-dependent absorbance changes of TMB for POD-like activity of RuN<sub>4</sub>-SAzyme.

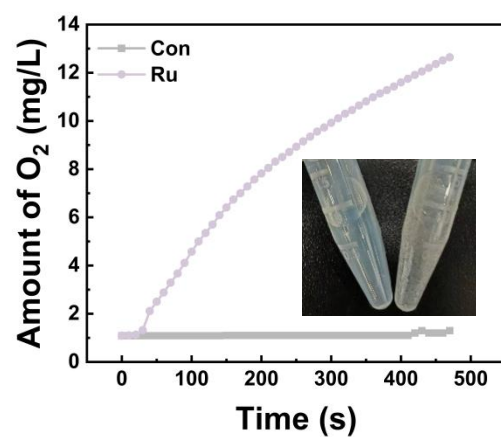

**Fig. S3** Dissolved oxygen generated in H<sub>2</sub>O<sub>2</sub> solutions with/without RuN<sub>4</sub>-SAzymes (100 µg/mL). The insert image is a photograph of RuN<sub>4</sub>-SAzyme (100 µg/mL) catalyzing the formation of oxygen bubbles in 500 mM H<sub>2</sub>O<sub>2</sub> solution after incubation for 5 min.

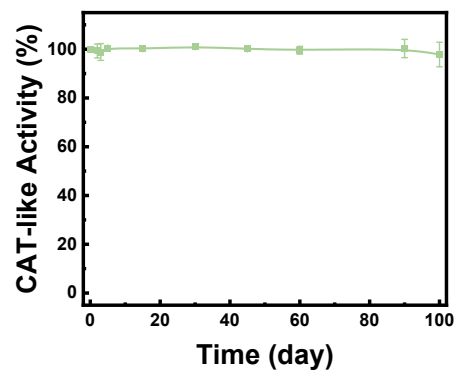

**Fig. S4** The stability of CAT-like activity of RuN<sub>4</sub>-SAzyme.

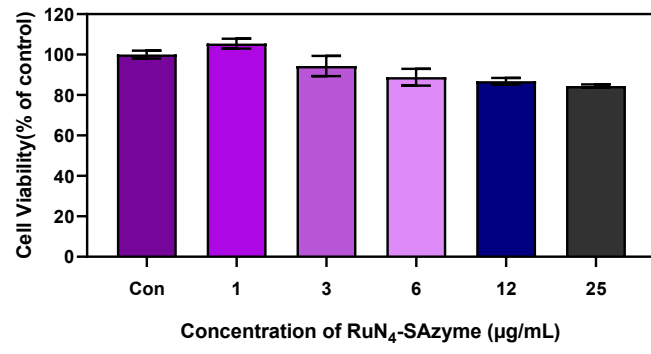

**Fig. S5** Cytotoxicity of RuN<sub>4</sub>-SAzyme on RAOECs.



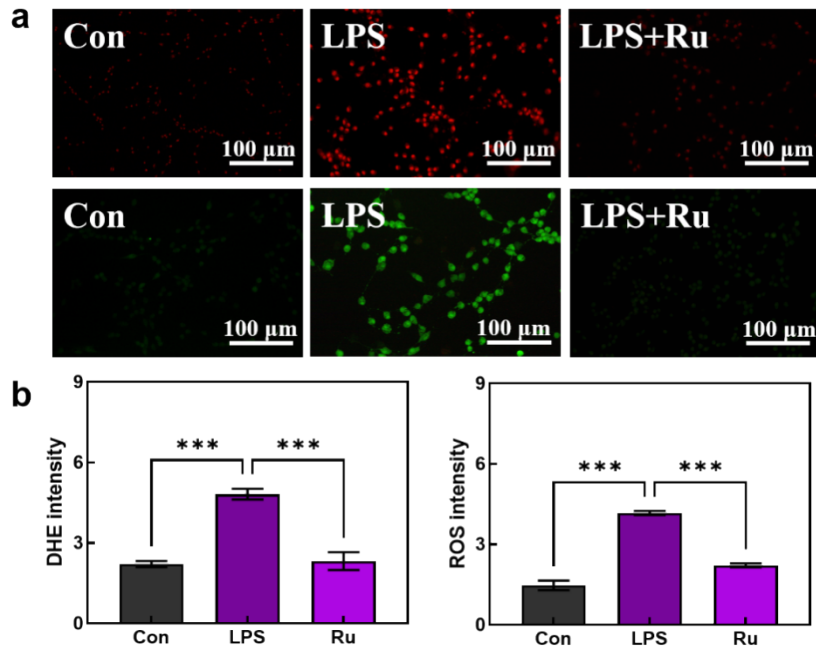

**Fig. S6 Anti-oxidative levels of RuN<sub>4</sub>-SAzyme *in vitro*.** a. Total ROS and  $O_2^{\bullet-}$  fluorescent staining in RAOECs induced by LPS before and after RuN<sub>4</sub>-SAzyme treatment. b. The corresponding quantitative intensity of the total ROS and  $O_2^{\bullet-}$  fluorescent staining in RAOEC cells induced by LPS before and after RuN<sub>4</sub>-SAzyme treatment. Data are presented as means  $\pm$  SEM. Asterisks indicate significant differences (\* $P$  < 0.05, \*\* $P$  < 0.01, \*\*\* $P$  < 0.001) versus with the eczema group, which were analyzed by one-way analysis of variance (ANOVA) with the Tukey test.

**Fig. S7** Photographs of the backs of mice with or without intervention on the second and twelfth days.

**Fig. S8** H&E staining of skin with or without intervention. The area circled by the rectangular box in the figure corresponds to the enlarged view of **Figure 3e**.

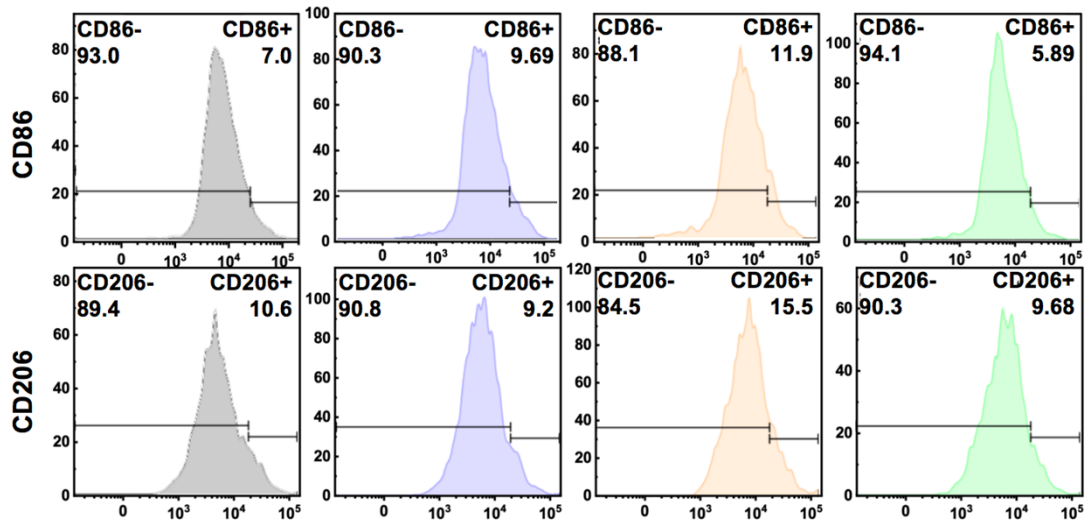

**Fig. S9** Representative gating strategy for analysis of M1 and M2 macrophages about flow cytometry.

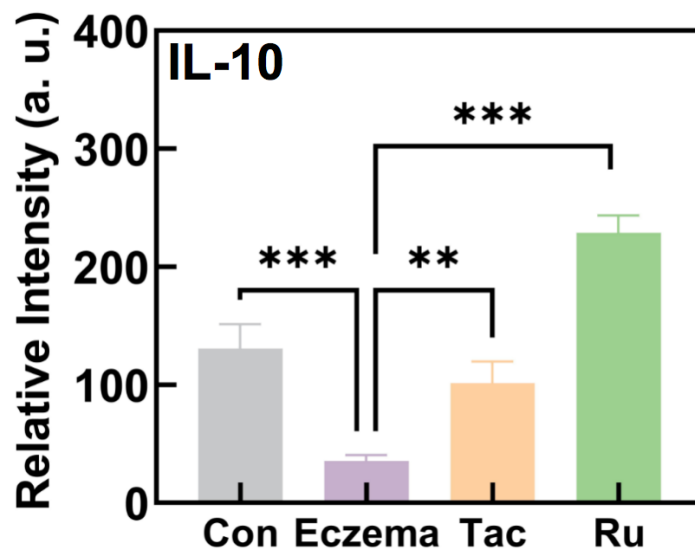

**Fig. S10** Corresponding quantitative analysis of IF staining ( $n = 3$  per group). Data are presented as means  $\pm$  SEM.

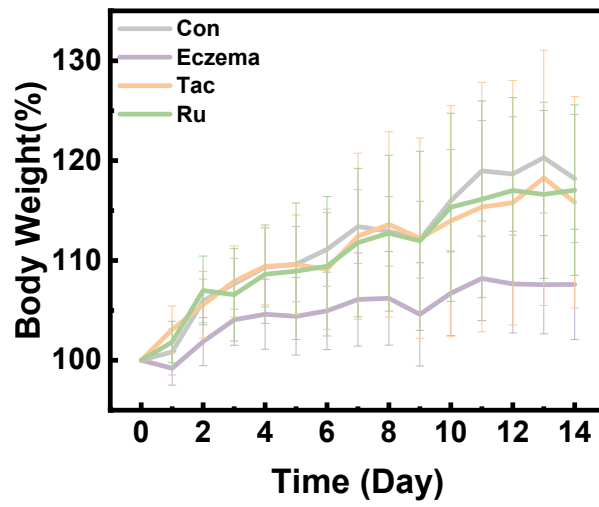

**Fig. S11** Body weight changes over time in groups with or without intervention ( $n = 8$  per group). Data are presented as means  $\pm$  SEM.

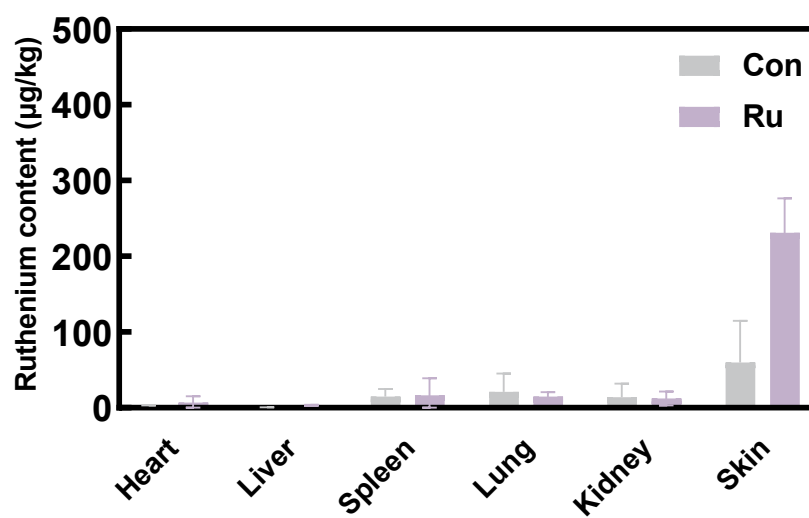

**Fig. S12** Metal content in the skin and major organs (heart, liver, spleen, lung, kidney) in the RuN<sub>4</sub>-SAzyme-treated group and Control group ( $n=3$  per group).

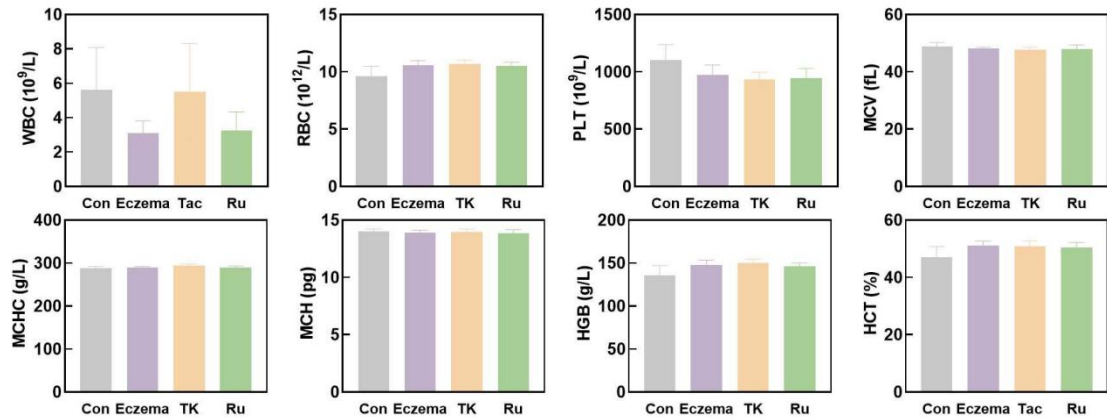

**Fig. S13** Hematology data of mice in groups with or without RuN<sub>4</sub>-SAzyme (n = 7 per group). WBC: white blood cells, RBC: red blood cells, PLT: platelets, MCV: mean corpuscular, MCHC: mean corpuscular hemoglobin concentration, MCH: mean corpuscular hemoglobin, HGB: hemoglobin, HCT: hematocrit. Data are presented as means  $\pm$  SEM.



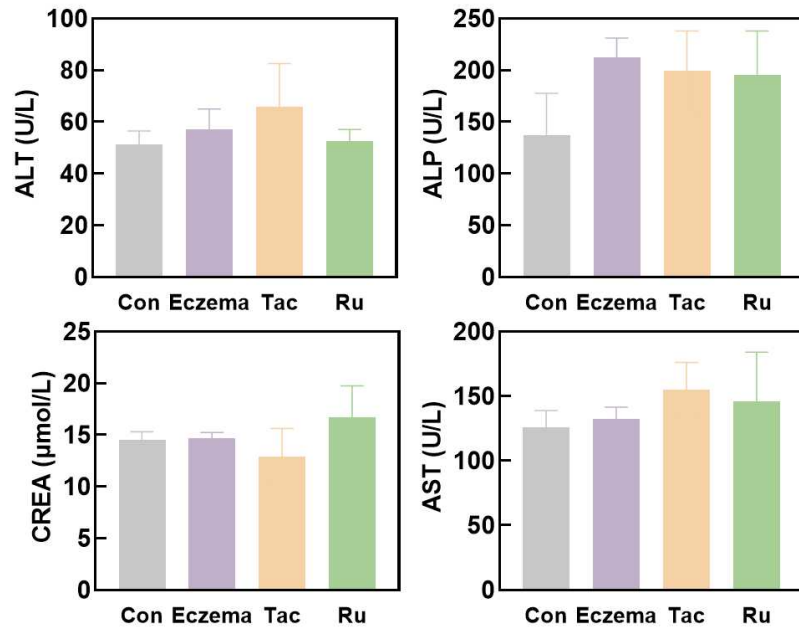

**Fig. S14** Hematology data of mice in groups with or without RuN<sub>4</sub>-SAzyme (n = 7 per group). ALT: Alanine aminotransferase, ALP: Alkaline phosphatase, CREA: Creatinine, AST: Aspartate transaminase. Data are presented as means  $\pm$  SEM.

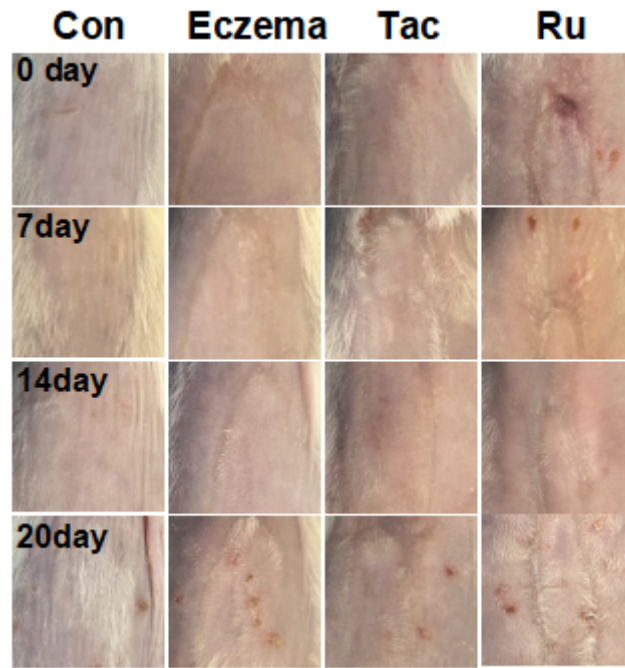

**Fig. S15** Photographs of the backs of mice with or without intervention on the 0, 7, 14 and 20 days after treatment.

**Supplementary Table S1.** Comparison of the kinetic parameters between RuN<sub>4</sub>-SAzyme and other single-atom nanozymes towards the TMB and H<sub>2</sub>O<sub>2</sub> substrates during the POD-mimic catalysis. <sup>1-7</sup>

| Enzyme                                      | Substance                     | K <sub>m</sub> (mM) | Reference                                  |
|---------------------------------------------|-------------------------------|---------------------|--------------------------------------------|
| RuN <sub>4</sub> -SAzyme                    | TMB                           | 0.077               | <b>This work</b>                           |
|                                             | H <sub>2</sub> O <sub>2</sub> | 16.09               |                                            |
| MoSA-N <sub>3</sub> -C                      | TMB                           | 0.79                | <i>Chem. Soc. Rev.</i> , 2021, <b>50</b> , |
|                                             | H <sub>2</sub> O <sub>2</sub> | 2                   | 7436                                       |
| ZnN <sub>4</sub> SAEs                       | TMB                           | 0.224               | <i>Angew. Chem. Int. Ed.</i> ,             |
|                                             | H <sub>2</sub> O <sub>2</sub> | 40.16               | 2019, <b>58</b> , 4911                     |
| Ru/CDs SAE                                  | TMB                           | 0.22                | <i>ACS Appl. Mater. Inter.</i>             |
|                                             | H <sub>2</sub> O <sub>2</sub> | 0.146               | 2021, <b>13</b> , 45269.                   |
| Fe-N <sub>5</sub>                           | TMB                           | 0.652               | <i>Adv. Mater.</i> 2022. <b>34</b> .       |
|                                             | H <sub>2</sub> O <sub>2</sub> | 11.2                | 2107088.                                   |
| FeBNC                                       | TMB                           | 2.22                | <i>Nano Today</i> 2020, <b>35</b> ,        |
|                                             | H <sub>2</sub> O <sub>2</sub> | 25.24               | 100971.                                    |
| CeN <sub>4</sub> -SAzyme <sub>800/0.1</sub> | TMB                           | 1.65                | <i>Nano Today</i> 2024, 56,                |
|                                             | H <sub>2</sub> O <sub>2</sub> | 18                  | 102236.                                    |
| pero-nanozysome                             | TMB                           | 0.18                | <i>Adv. Funct. Mater.</i>                  |
|                                             | H <sub>2</sub> O <sub>2</sub> | 175.5               | 2020, <b>31</b> ,2007130.                  |

## Reference:

1. Q. Chang, J. Wu, R. Zhang, S. Wang, X. Zhu, H. Xiang, Y. Wan, Z. Cheng, M. Jin, X. Li, P. Xu, F. Jin and J. Wang, *Nano Today*, 2024, **56**, 102236.
2. C. Jiang, H. Huang, X. Kang, L. Yang, Z. Xi, H. Sun, M. D. Pluth and L. Yi, *Chem. Soc. Rev.*, 2021, **50**, 7436-7495.
3. L. Jiao, W. Xu, Y. Zhang, Y. Wu, W. Gu, X. Ge, B. Chen, C. Zhu and S. Guo, *Nano Today*, 2020, **35**, 100971.
4. W. Wang, Y. Zhu, X. Zhu, Y. Zhao, Z. Xue, C. Xiong, Z. Wang, Y. Qu, J. Cheng, M. Chen, M. Liu, F. Zhou, H. Zhang, Z. Jiang, Y. Hu, H. Zhou, H. Wang, Y. Li, Y. Liu and Y. Wu, *ACS Appl. Mater. Interfaces*, 2021, **13**, 45269-45278.
5. J. Xi, R. Zhang, L. Wang, W. Xu, Q. Liang, J. Li, J. Jiang, Y. Yang, X. Yan, K. Fan and L. Gao, *Adv. Funct. Mater.*, 2021, **31**, 2007130.
6. B. Xu, S. Li, L. Zheng, Y. Liu, A. Han, J. Zhang, Z. Huang, H. Xie, K. Fan, L. Gao and H. Liu, *Adv. Mater.*, 2022, **34**, 2107088.
7. B. L. Xu, H. Wang, W. W. Wang, L. Z. Gao, S. S. Li, X. T. Pan, H. Y. Wang, H. L. Yang, X. Q. Meng, Q. W. Wu, L. R. Zheng, S. M. Chen, X. H. Shi, K. L. Fan, X. Y. Yan and H. Y. Liu, *Angew. Chem. Int. Ed.*, 2019, **58**, 4911-4916.
